# Supplementary material for: Nodal-induced L1CAM/CXCR4 subpopulation sustains tumor growth and metastasis in colorectal cancer derived organoids
Source: PubMed Central journal article supplement (PMC8058729; doi:10.7150/thno.54027), 2021-03-31
Supplement: thnov11p5686s1.pdf [file thnov11p5686s1.pdf]

Figure S1

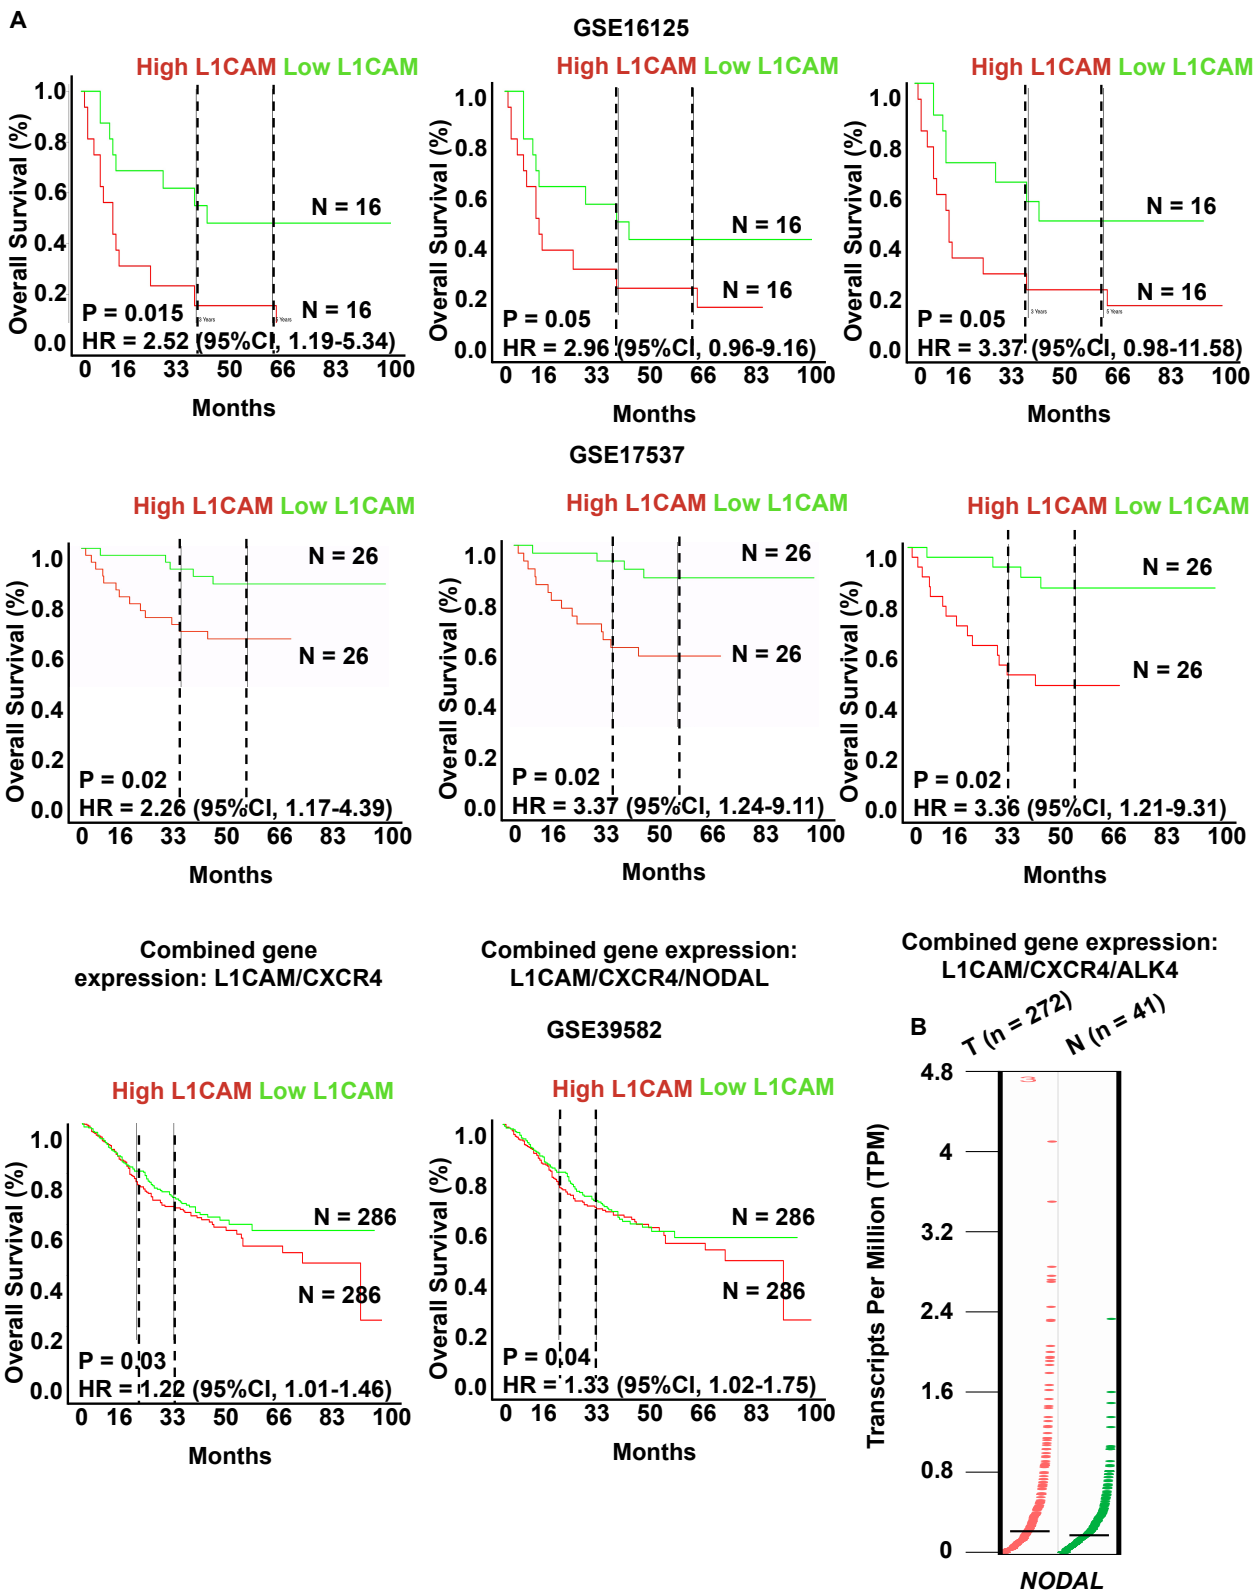

**Figure S1 - Detection of L1CAM/CXCR4 subpopulation in human CRC**

(A) Kaplan-Meier curves showing overall survival of CRC patients, stratified according to the median value of *L1CAM* and *CXCR4* expression. A Median Group cut-off (50% High vs 50% Low) was used for *L1CAM* and (25% High vs 75% Low) was used for *CXCR4*. (B) Expression levels of *L1CAM/CXCR4/ALK4* in a series of CRC (T, n = 272) and adjacent normal colon (N, n = 41) tissue samples using GEPIA (Gene Expression Profiling Interactive Analysis) webserver.

Supplementary Figure 2

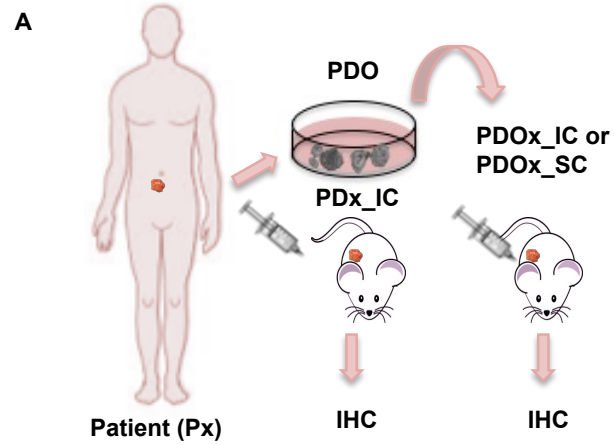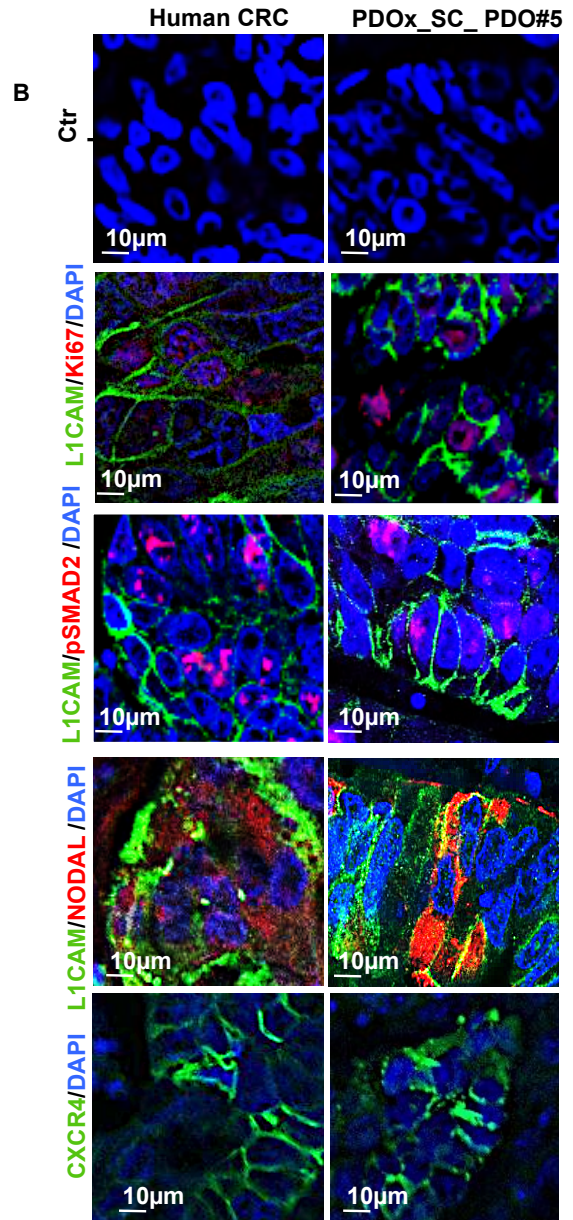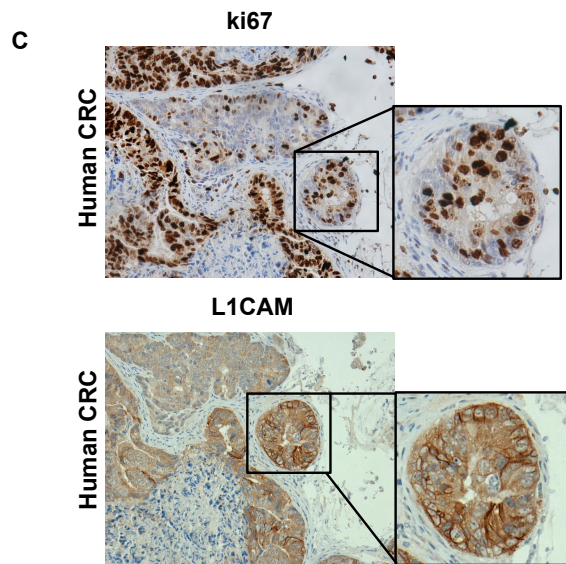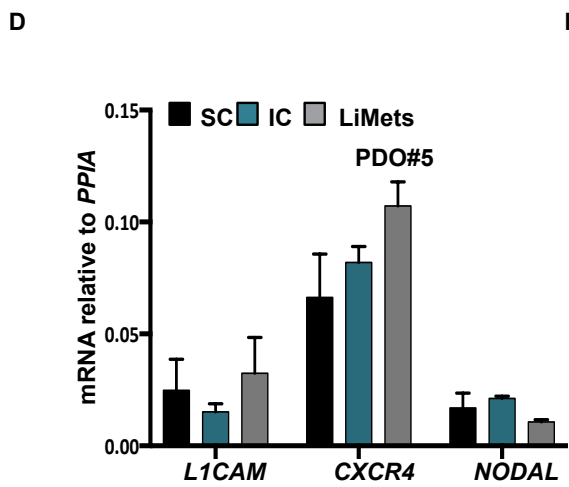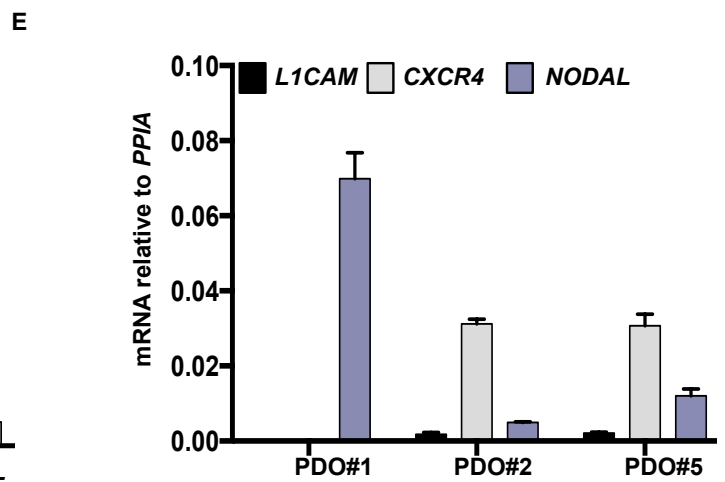

**Figure S2 - Detection of L1CAM/CXCR4 subpopulation in human CRC**

(A) Schematic representation of PDOs generation. PDx were isolated from fresh patient biopsies and injected in the caecum (IC) of immunocompromised mice. Then, the cells obtained from enzymatic digestion of PDx\_IC were cultured in matrigelas PDO and then subcutaneously (PDOx\_SC) or intracaecum (PDOx\_IC) injected in nude mice. (B) Confocal images for L1CAM (green), Ki67 (red), pSMAD2 (red), NODAL (red), CXCR4 (green) and nuclei (blue, DAPI) in the human CRC and PDOx-SC\_PDO#5. (C) Representative immunohistochemistry for Ki67 and L1CAM (brown) in tissue section from human CRC patients. (D) qPCR analysis of *L1CAM*, *CXCR4* and *NODAL* in PDO#5 human organoids. Data are normalized to *PPIA* expression. Data are mean  $\pm$  SD,  $n \geq 6$ . (E) qPCR analysis for *L1CAM*, *CXCR4* and *NODAL* in PDO#1, PDO#2 and PDO#3. Data are normalized to *PPIA* expression.  $N \geq 6$ .

Figure S3

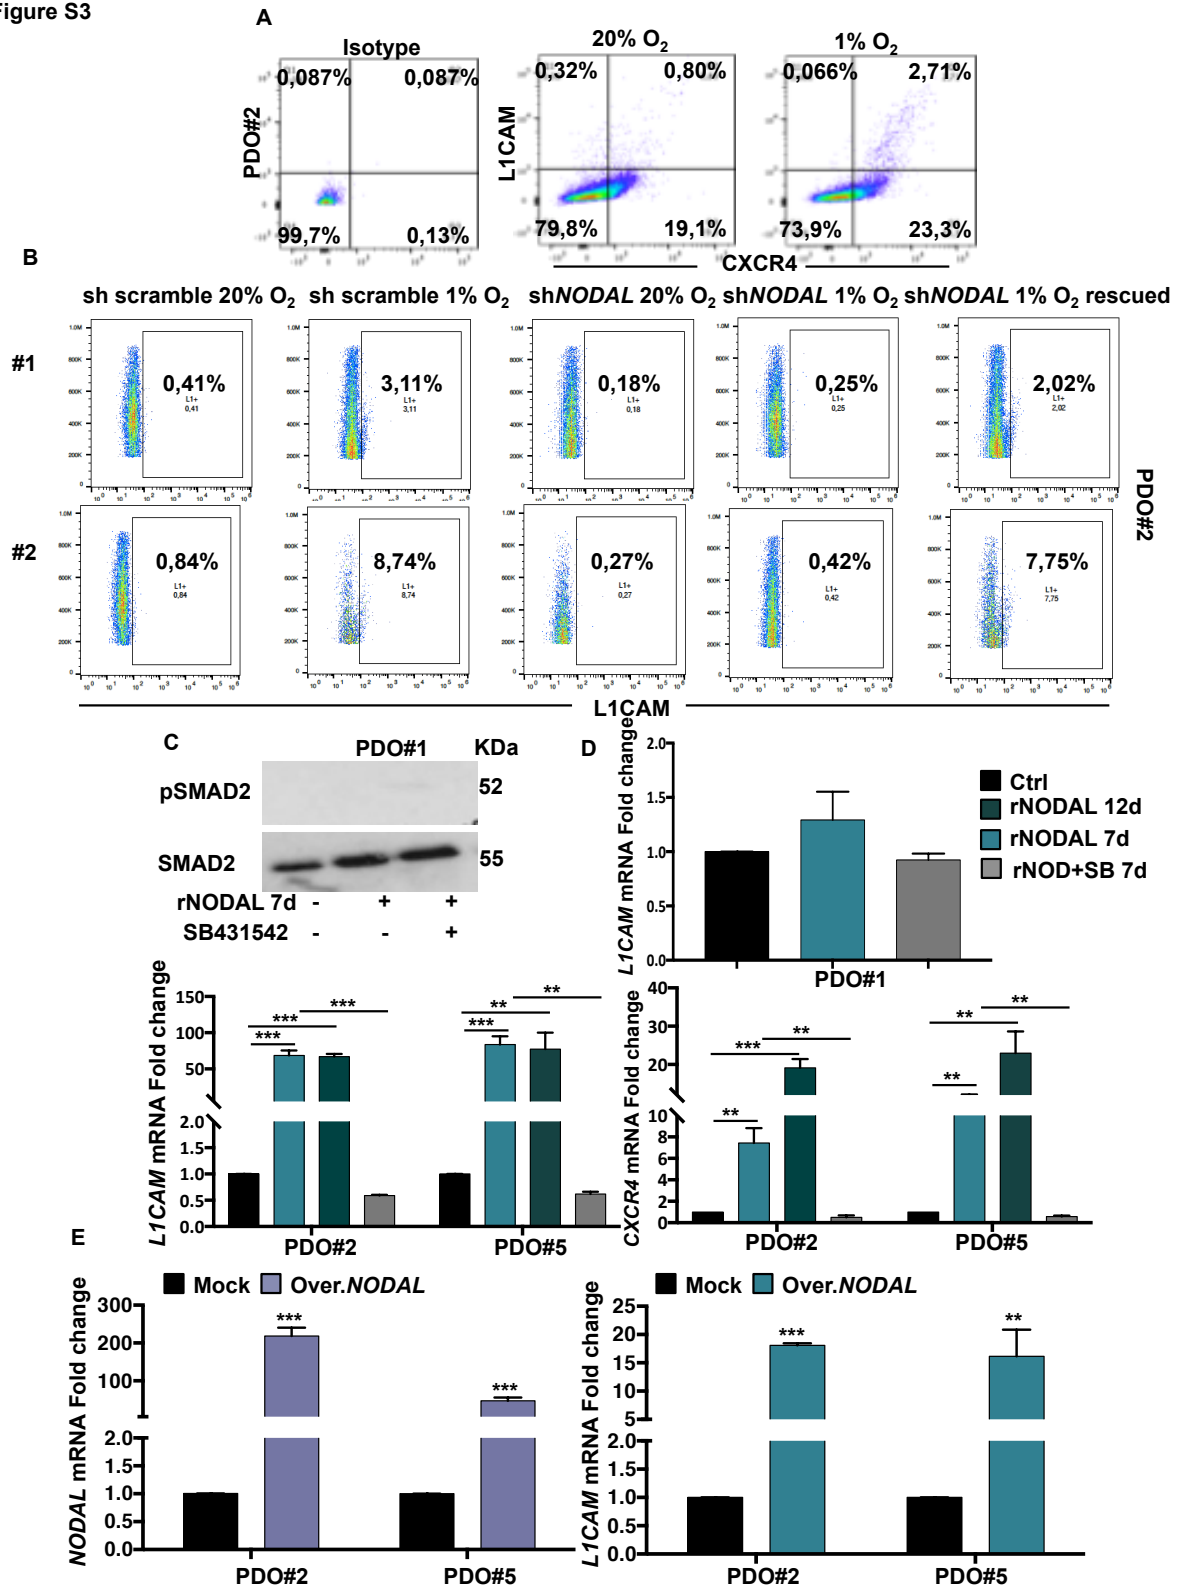

**Figure S3 - Nodal induces L1CAM and CXCR4 expression in human CRC organoids**

(A) Representative flow cytometry for L1CAM and CXCR4 in PDO#2 growth in normoxia or hypoxia. All cytometry gates were established based on isotype controls.  $N \geq 3$ . (B) Representative flow cytometry analysis for L1CAM in PDO#2 sh scramble or sh*NODAL*#1 and #2 growth in normoxia or hypoxia. The sh*NODAL* #1 and #2 growth in hypoxia were rescued with rNODAL.  $N \geq 3$ . (C) Western blot analysis of pSMAD2 in PDO#1 treated or untreated with rNODAL for 7 days in presence or absence of SB431542. Parallel SMAD2 immunoblotting was performed. (D) qPCR analysis of *L1CAM* and *CXCR4* in PDO#1, PDO#2 and PDO#5 treated or untreated with rNODAL for 7 and 12 days in presence or absence of SB431542. Data are normalised to *PPIA* expression and are presented as fold change (FC) in gene expression relative to control cells. \*\* $p < 0.005$ , \*\*\* $p < 0.0005$  compared with Ctrl.  $N \geq 6$ . (E) qPCR analysis of *NODAL* and *L1CAM* in PDO#2 and PDO#5 transfected with control vector (mock) or *NODAL* overexpressing vector. Data are normalised to *PPIA* expression and are presented as fold change in gene expression relative to mock-transfected cells. \*\* $p < 0.005$ , \*\*\* $p < 0.0005$ .  $n \geq 6$ .

Figure S4

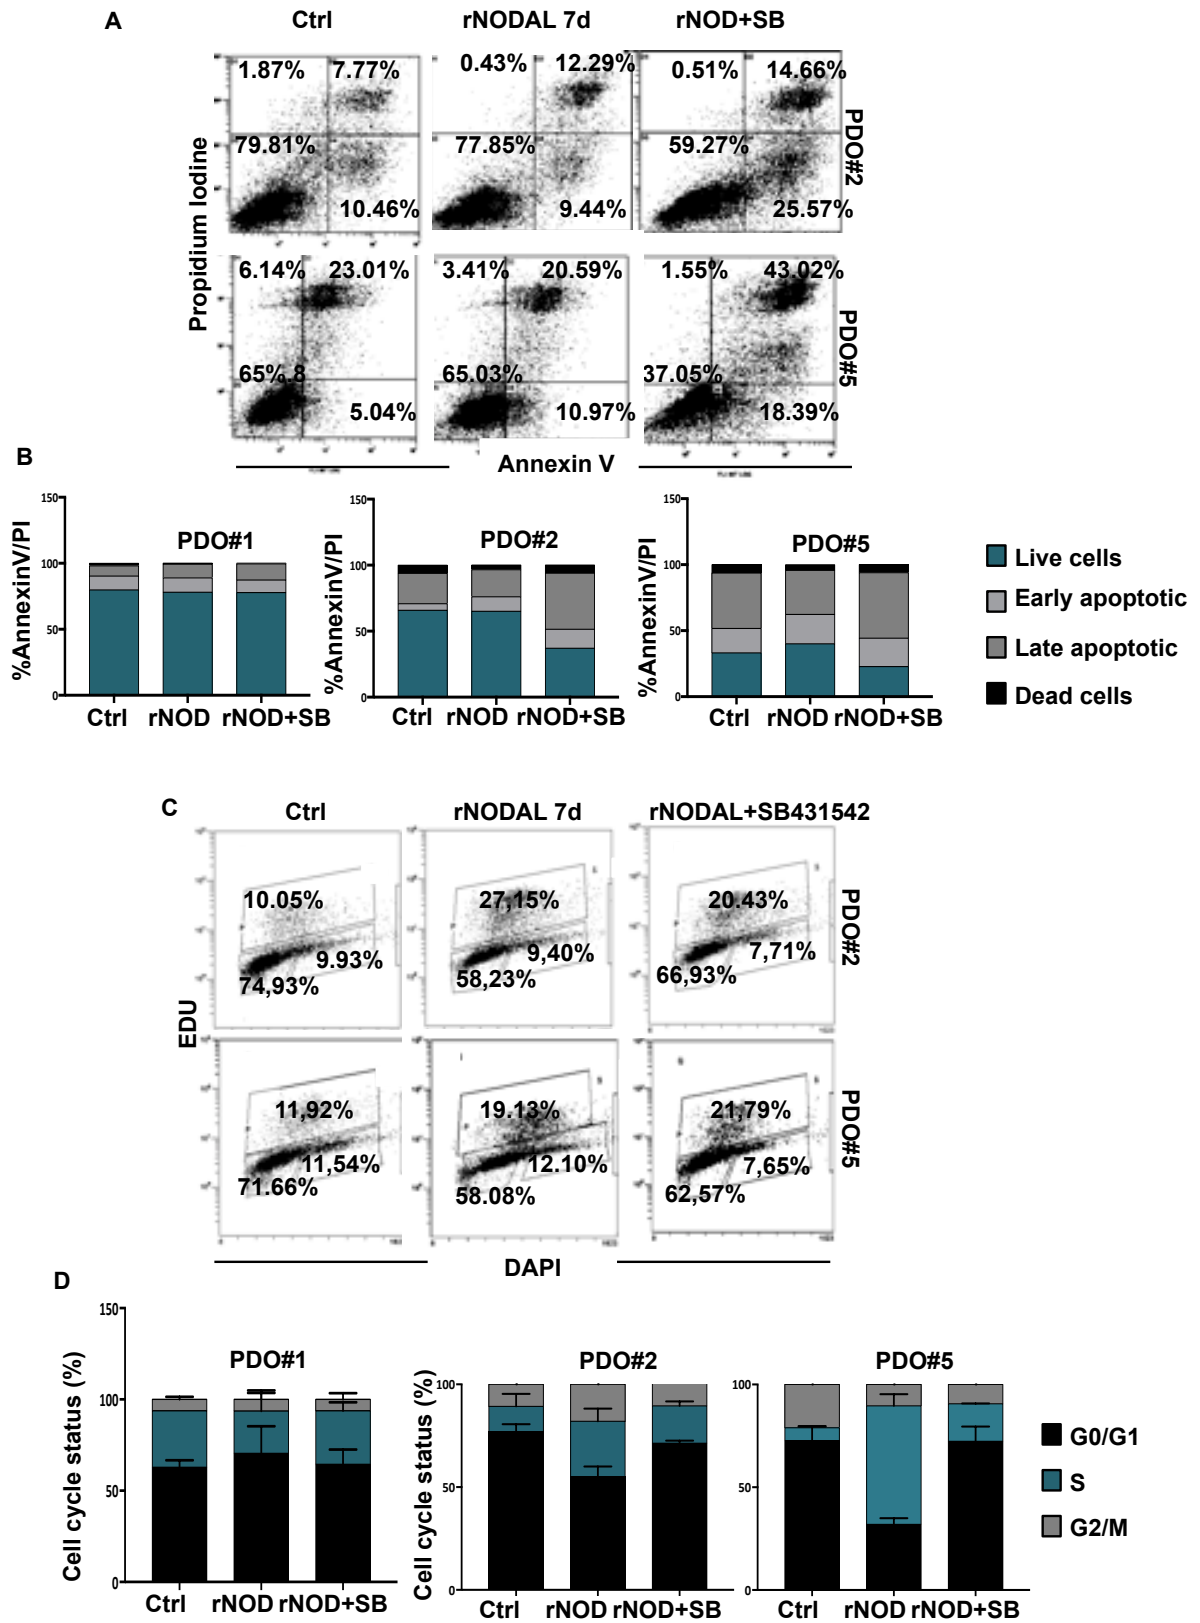

**Figure S4 - Nodal induces L1CAM and CXCR4 expression in human CRC organoids**

(A) Representative flow cytometry plots for apoptotic cells as determined by AnnexinV/PI staining in PDO#2 and PDO#5 treated or untreated with rNODAL for 7 days in presence or absence of SB431542. (B) Percentage of apoptotic cells as determined by AnnexinV/PI staining in control PDO#1, PDO#2 and PDO#5 treated or untreated with rNODAL for 7 days in presence or absence of SB431542. (C) Representative flow cytometry plots for cell cycle analysis performed with EDU incorporation in PDO#2 and PDO#5 treated or untreated with rNODAL for 7 days in presence or absence of SB431542. (D) Percentage of PDO#1, PDO#2 and PDO#5 derived cells in each phase of cell cycle treated or untreated with rNODAL for 7 days in presence or absence of SB431542.



Figure S5

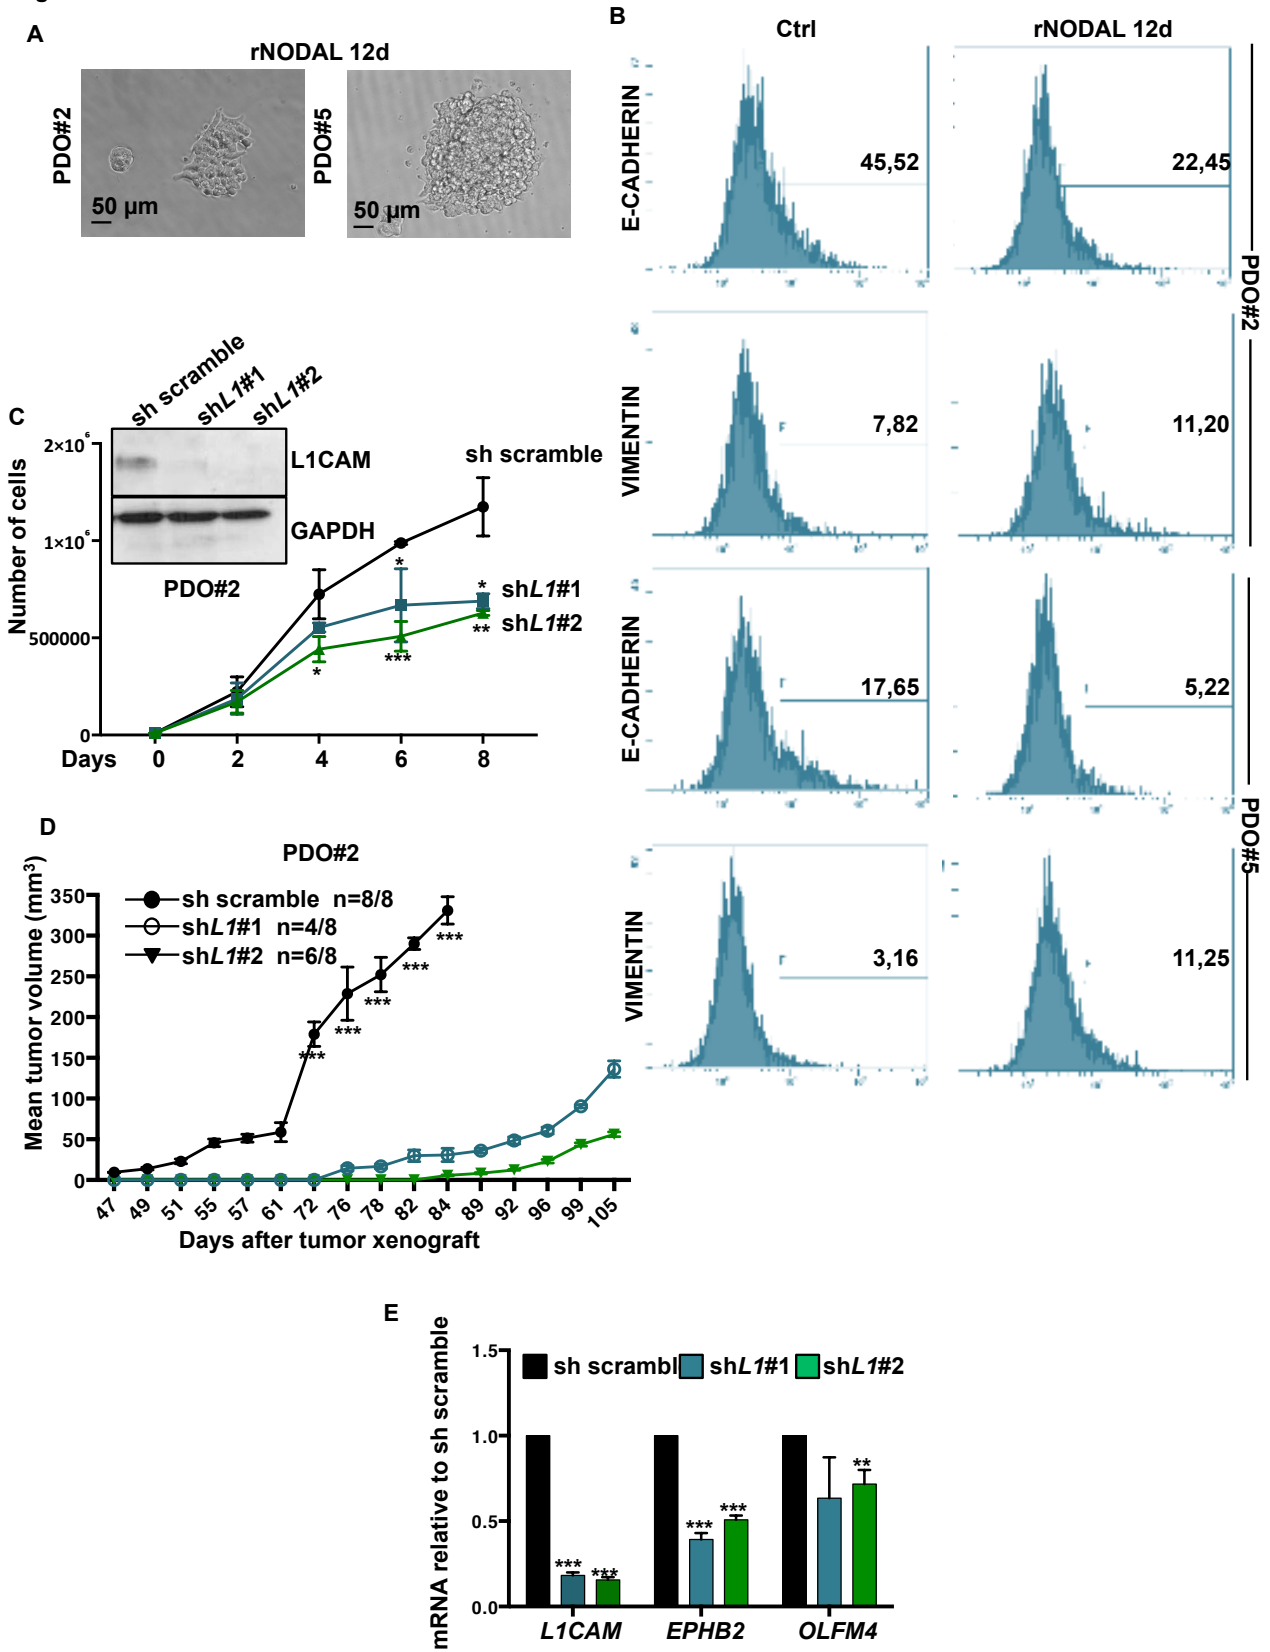

**Figure S5 - Identification of metastatic L1CAM<sup>high</sup>/CXCR4<sup>high</sup> subpopulation in CRC organoids**

(A) Representative images of PDO#2 and PDO#5 treated with rNODAL for 12 days. (B) Representative flow cytometry plots of E-CADHERIN and VIMENTIN in Ctrl vs 12-days NODAL treated organoids. (C) Western blot analysis of L1CAM in PDO#2 sh scramble and sh*L1*. Parallel GAPDH immunoblotting was performed. Cells growth curves for PDO#2 sh scramble and sh*L1*. Each data point represents the mean  $\pm$  SD of three independent experiments. \*\* $p < 0.005$ ; \*\*\* $p < 0.0005$  compared to sh scramble.  $n \geq 6$ . (D) *In vivo* tumor growth of subcutaneously injected PDO#2 control (sh scramble) and sh*L1*. Tumor size was measured every 2–5 days and tumor volume was calculated. Data are shown as mean (points)  $\pm$  s.d. \*\*\* $p < 0.0005$  compared to sh scramble.  $N = 8$ . (E) qPCR analysis for *L1CAM*, *EPHB2* and *OLFM4* in sh scramble and sh*L1* PDO#2 sh scramble and sh*L1*. Data are normalised to *PPIA* expression. \*\* $p < 0.005$  \*\*\* $p < 0.0005$ .  $n \geq 6$ .

**Figure S6**

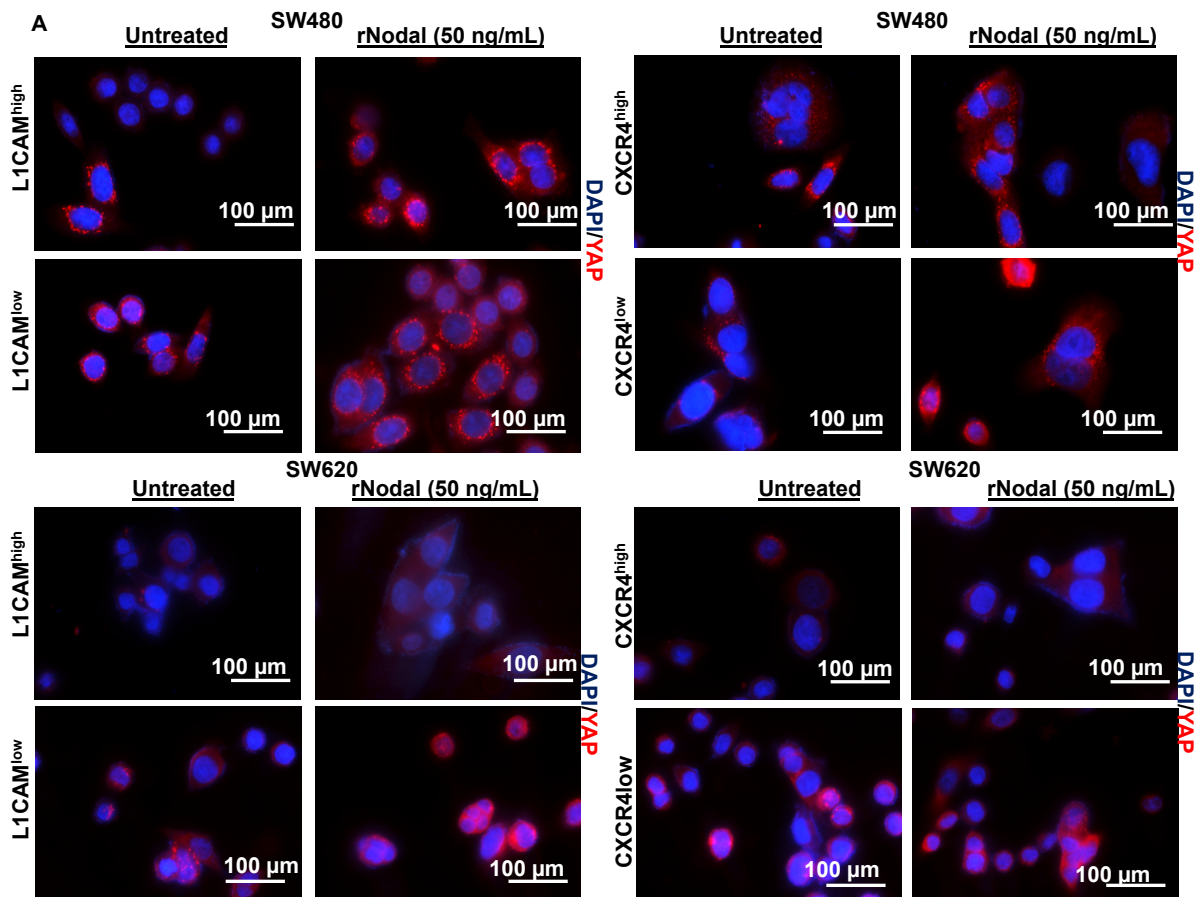

B

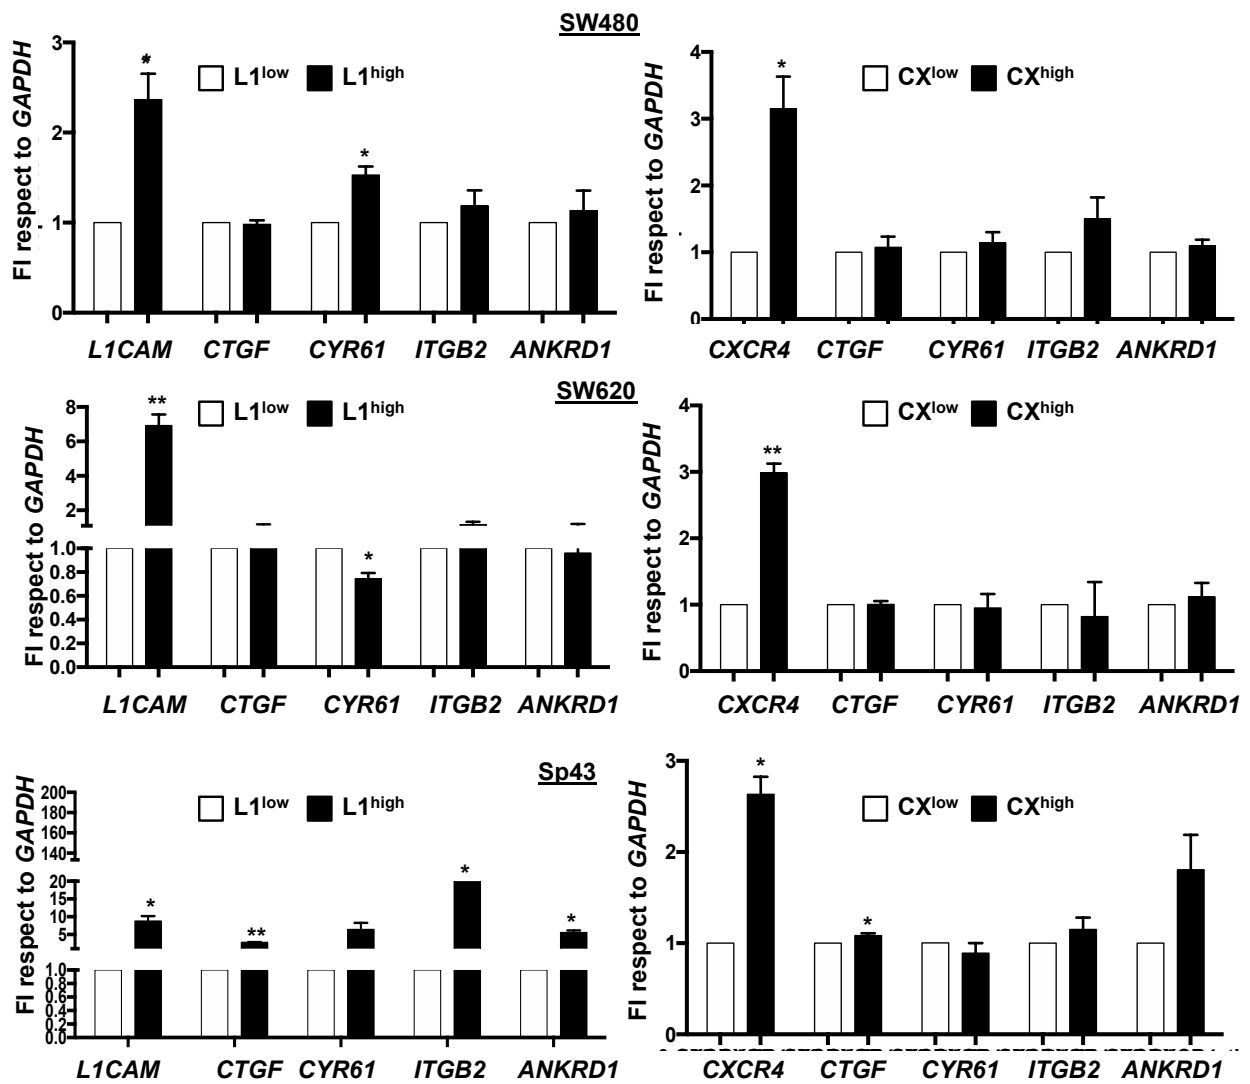

**Figure S6 - Nodal stimulation does not cause an L1CAM and CXCR4 dependent YAP nuclear localization**

(A) Confocal images for YAP (red) and nuclei (blue, DAPI) of SW480 and SW620 L1CAM or CXCR4 sorted cells treated or untreated with rNODAL (short treatment). (B) qPCR analysis of L1CAM, CXCR4, CTGF, CYR61, ANKRD1 and ITGB2 in SW480, SW620 and PDO#2sorted for L1CAM or CXCR4. Data are normalized to GAPDH expression and are presented as fold change in gene expression relative to untreated cells. \* $p < 0.05$ , \*\* $p < 0.005$ .  $n \geq 6$ .

Figure S7

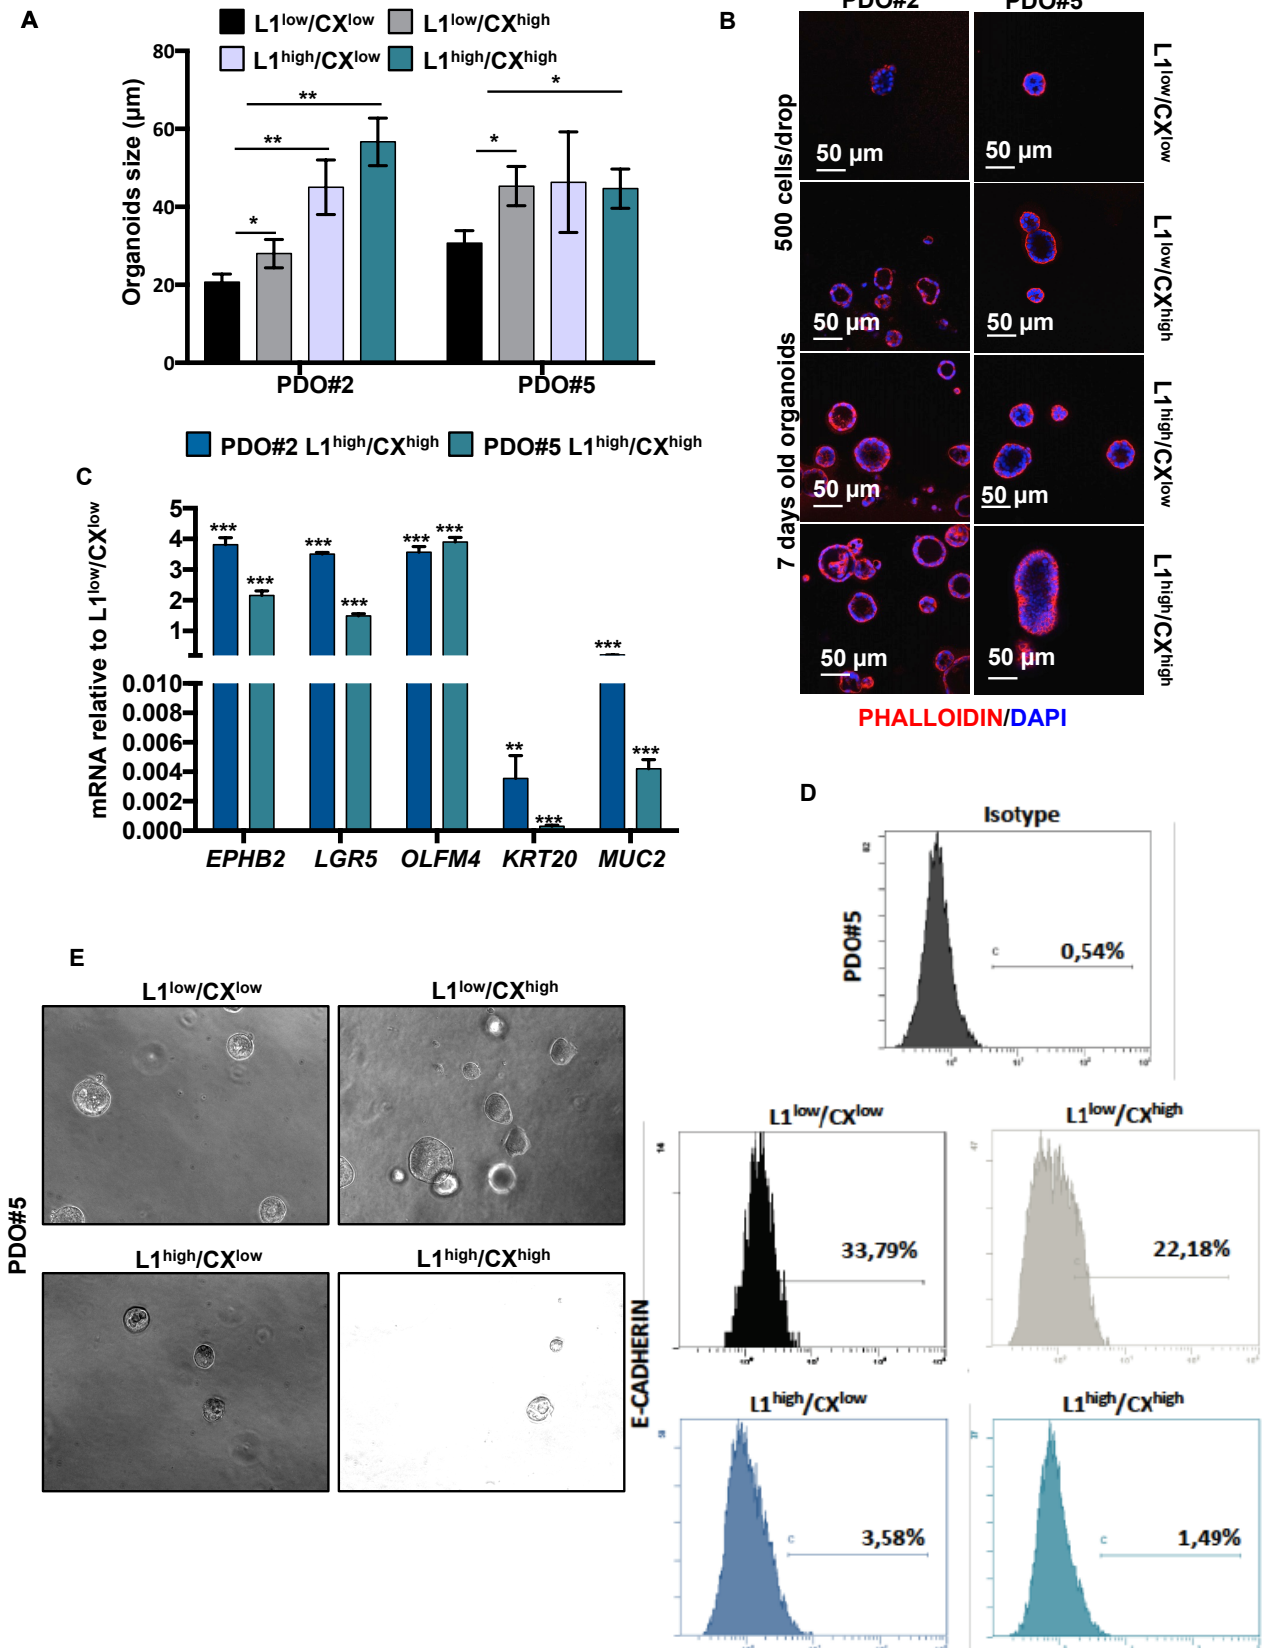

**Figure S7 - Identification of metastatic L1CAM<sup>high</sup>/CXCR4<sup>high</sup> subpopulation in CRC organoids**

(A) Quantification of organoids size in the four sorted indicated populations from PDO#2 and PDO#5. (B) Confocal images for phalloidin (red) and nuclei (blue, DAPI) of PDO#2 and PDO#5. (C) qPCR analysis for *EPHB2*, *LGR5*, *OLFM4*, *KRT20* and *MUC2* in the L1<sup>low</sup>/CX<sup>low</sup> and L1<sup>high</sup>/CX<sup>high</sup> populations sorted from PDO#2 and PDO#5. Data are normalised to *PPIA* expression. \*\*p<0.005 \*\*\*p<0.0005. n ≥ 6. (D) Representative flow cytometry plots of E-CADHERIN in the four sorted indicated populations. (E) Representative invasion assay videos of PDO#5 human organoids expressing different L1CAM and CXCR4 levels.

**SUPPLEMENTARY METHODS**

| Antibody         | Manufacturer and Reference    | Technique and dilution used                                                |
|------------------|-------------------------------|----------------------------------------------------------------------------|
| Phospho-Smad2    | Cell Signaling, Ref. 3108     | Immunohistochemistry and Immunofluorescence (1/100), Western Blot (1/1000) |
| E-Cadherin-FITC  | BD Bioscience Ref. 612130     | Immunofluorescence (1/50)                                                  |
| Phalloidin-TRITC | Sigma Ref. P1951              | Immunofluorescence (1/2500)                                                |
| L1CAM-PE         | eBioscience, Ref. 12-1719-42  | Immunofluorescence and Flowcytometry (1/200)                               |
| Ki67-FITC        | eBioscience, Ref. 11-5699-42  | Immunofluorescence (1/200)                                                 |
| CXCR4-FITC       | R&D systems, Ref. FAB170F-100 | Immunofluorescence and Flowcytometry (1/100)                               |
| NODAL            | Abcam, Ref:ab55676            | Immunohistochemistry and Immunofluorescence (1/200)                        |
| YAP              | Cell Signaling, Ref. 12395    | Immunofluorescence (1/200)                                                 |

**TABLE S1-** List of primary antibodies used.

| Gene symbol      | TaqMan Assay ID |
|------------------|-----------------|
| <i>ABCG1</i>     | Hs00245154_m1   |
| <i>CDH1</i>      | Hs01023894_m1   |
| <i>CDKN1A</i>    | Hs00355782_m1   |
| <i>CDKN1B</i>    | Hs01597588_m1   |
| <i>CDKN1C</i>    | Hs00175938_m1   |
| <i>CYCLIN-D1</i> | Hs00765553_m1   |
| <i>CXCR4</i>     | Hs00237052_m1   |
| <i>EPHB2</i>     | Hs00362096_m1   |
| <i>KI67</i>      | Hs01032443_m1   |
| <i>L1CAM</i>     | Hs01109748_m1   |
| <i>NODAL</i>     | Hs00415443_m1   |
| <i>OLFM4</i>     | Hs00197437_m1   |
| <i>PPIA</i>      | Hs99999904_m1   |
| <i>SNAIL1</i>    | Hs00195591_m1   |
| <i>VIMENTIN</i>  | Hs00185584_m1   |

**TABLE S2-** List of TaqMan probes used for qPCR.

| Gene symbol   | Forward primer (5'->3')   | Reverse primer (5'->3')  |
|---------------|---------------------------|--------------------------|
| <i>CYR61</i>  | AAACCCGGATTTGTGAGGT       | GCTGCATTTCTTGCCCTT       |
| <i>ANKRD1</i> | AGACTCCTTCAGCCAACATGATG   | CTCTCCATCTCTGAAATCCTCAGG |
| <i>ITGB2</i>  | GATGAGAGCCGAGAGTGTGT      | TCCTTCTCAAAGCGCCTGTA     |
| <i>YAP</i>    | TAGCCCTGCGTAGCCAGTTA      | TCATGCCTTAGTCCACTGTCTGT  |
| <i>CTGF</i>   | CTGCCTGGGAAATGCTGCGAGGAGT | GTTGGGTCTTGGGCCAAATGT    |
| <i>CXCR4</i>  | GGTGGTCTATGTTGGCGTCT      | TGGAGTGTGACAGCTTGGAG     |
| <i>L1CAM</i>  | CACTATGGCCTTGTCTGGGA      | ACATACTGTGGCGAAAGGGA     |
| <i>GAPDH</i>  | CAGGAGCGAGATCCCT          | GGTGCTAAGCAGTTGGT        |

**TABLE S3-** List of primers used for qPCR (SYBR green method).

| Symbol   | OligoSeq                                                       |
|----------|----------------------------------------------------------------|
| NODAL    | CCGGGCGGTTTCAGATGGACCTATTCTCGAGAATAGGT<br>CCATCTGAAACCGCTTTTTG |
| NODAL    | CCGGGTGCTCCTAGATCACCATAAACTCGAGTTTATGGT<br>GATCTAGGAGCACTTTTTG |
|          |                                                                |
| L1CAM    | CCGGCCACTTGTTTAAGGAGAGGATCTCGAGATCCTCTC<br>CTTAAACAAGTGGTTTTTG |
| L1CAM    | CCGGGCTAACCTGAAGGTTAAAGATCTCGAGATCTTTAA<br>CCTTCAGGTTAGCTTTTTG |
| SCRAMBLE | CCGGCAACAAGATGAAGAGCACCAACTCGAGTTGGTGC<br>TCTTCATCTTGTTTTTT    |

**TABLE S4-** List of nucleotide sequence of shRNA used.
